# Supplementary material
Source: Springer Nature journal article supplement (https://www.springermedizin.de/resource/supplementary/12889_2011_3371_MOESM5_ESM.pdf/9488836)

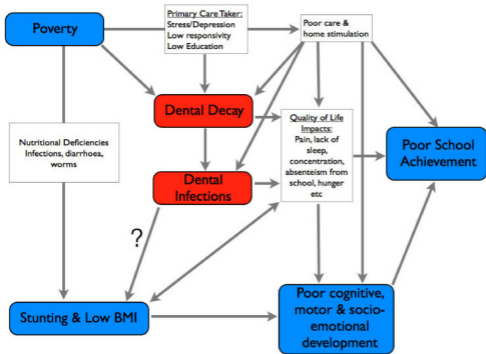

Supplement: MOESM5 [file 9488836]
